# Supplementary material for: The Rich Get Stronger: The Purse Seine Fishery of the Turkish Straits System
Source: MDPI journal article supplement (doi:10.3390/fishes7060301), 2022-10-22
Supplement: s1 [file s1]

Archive with 1 entries (1 files):
- fishes-1931973-supplementary.pdf
