# Supplementary material for: The Rich Get Stronger: The Purse Seine Fishery of the Turkish Straits System
Source: MDPI journal article supplement (doi:10.3390/fishes7060301), 2022-10-22
Supplement: s1 [file s1 › fishes-1931973-supplementary.pdf]

## Article

# The Rich Get Stronger: The Purse Seine Fishery of the Turkish Straits System

Sefer Furkan Koyun, Taner Yıldız and Aylin Ulman

**Table S1.** Specifics of the Mediterranean Sea purse seine fleets including number of vessels, engine power and gross tonnage by country and region (for Turkey; Source: GFCM, 2022). Our study area, Sea of Marmara purse seine fleet details are presented in bold.

| Country                 | # Vessels | Engine Power (kW) | GT    |
|-------------------------|-----------|-------------------|-------|
| Albania                 | 11        | 4853              | 502   |
| Algeria                 | 330       | 99981             | 18574 |
| Croatia                 | 145       | 49293             | 12413 |
| Cyprus                  | 4         | 1243              | 284   |
| Egypt                   | 241       | 34954             | 9381  |
| France                  | 7         | 4735              | 1023  |
| Georgia                 | 19        | 13513             | 5248  |
| Greece                  | 211       | 49754             | 14881 |
| Israel                  | 7         | 1392              | 387   |
| Italy                   | 191       | 56315             | 13372 |
| Lebanon                 | 1         | 53                | 1.7   |
| Morocco                 | 8         | 2127              | 447   |
| Spain                   | 151       | 27044             | 9593  |
| Tunisia                 | 134       | 49284             | 9863  |
| Ukraine                 | 4         | 328               | 133   |
| Turkey (total)          | 474       | 257013            | 54351 |
| Turkey (Aegean Sea)     | 39        | 15754             | 3417  |
| Turkey (Levant Sea)     | 61        | 25733             | 4622  |
| Turkey (Black Sea)      | 255       | 149976            | 32173 |
| Turkey (Sea of Marmara) | 119       | 65549             | 14138 |

**Table S2.** Change.org petitions showing the topics raised pertaining to fishing in the region with number of signatures and commencement year.

| Topic issue                                                                                                       | Petition creating group type           | Number of signatory | Status  | Starting year |
|-------------------------------------------------------------------------------------------------------------------|----------------------------------------|---------------------|---------|---------------|
| Petitions on industrial fishing in Istanbul Strait                                                                |                                        |                     |         |               |
| Purse seine fishing should be banned in the Istanbul Strait!                                                      | Nonprofit member-supported association | 17653               | Closed  | 2016          |
| No small fish, no big fish. Let the Istanbul Strait be closed to purse seine fishing                              | Citizen                                | 15547               | Closed  | 2015          |
| Trawl fishing should be done at a depth of 40 meters, purse seine fishing should be banned in the Istanbul Strait | Citizen                                | 6935                | Ongoing | 2021          |
| Be the silent cry of the fish!                                                                                    | Fishery Cooperatives Union             | 4355                | Closed  | 2019          |

|                                                                                                  |                        |        |         |      |
|--------------------------------------------------------------------------------------------------|------------------------|--------|---------|------|
| We don't want purse seiners in the Istanbul Strait, fish will go extinct                         | Citizen                | 3052   | Closed  | 2020 |
| Increase fishing with purse seine nets from 24 meters to 50 meters in our territorial waters     | Citizens               | 2274   | Closed  | 2014 |
| Increase the minimum landing size limit of the bluefish to 22 cm                                 | Citizen                | 1303   | Closed  | 2016 |
| Migratory fish slaughter must end                                                                | Citizen                | 507    | Ongoing | 2021 |
| All kinds of fishing activities with nets in the Istanbul Strait should be banned immediately!!! | Environmental activist | 267    | Ongoing | 2019 |
| Protecting the Fish Population                                                                   | Citizen                | 148    | Ongoing | 2020 |
| Let's protect our seas                                                                           | Citizen                | 78     | Ongoing | 2018 |
| Minimum Fishing Depth must be 50 m!                                                              | Citizen                | 68     | Closed  | 2015 |
| Banning of fish slaughter with purse seine boats                                                 | Citizen                | 30     | Closed  | 2013 |
| The minimum purse seine fishing depth must be from 24 meters to 50 meters                        | Citizen                | 23     | Ongoing | 2018 |
| Bluefish wanted!                                                                                 | Citizen                | 7      | Closed  | 2015 |
| Petitions on purse seine fishing                                                                 |                        |        |         |      |
| Ban purse seine and trawl fishing in the Gulf of Gemlik/Mudanya                                  | Citizen                | 697    | Closed  | 2016 |
| No to slaughter in our sea                                                                       | Amateur fisher         | 179    | Ongoing | 2021 |
| Petitions for an anchovy fishing ban                                                             |                        |        |         |      |
| Anchovy injustice                                                                                | Citizen                | 8      | Ongoing | 2021 |
| Anchovy ban should be cancelled!                                                                 | Citizen                | 7      | Ongoing | 2021 |
| Petitions on the sea snout (mucilage)                                                            |                        |        |         |      |
| Don't let the Sea of Marmara die. We invite institutions against sea snout                       | A group of citizen     | 191716 | Ongoing | 2021 |
| To finish the mucilage in Marmara                                                                | Citizen                | 10     | Ongoing | 2021 |
| Petitions on dolphin protection                                                                  |                        |        |         |      |
| Ban terrestrial hunting weapons on fishing boats!                                                | A marine foundation    | 1482   | Ongoing | 2015 |

**Table S3.** Total itemized costs pertaining to the purse seine vessels and their technological investments. Prices in US Dollar.

| Vessel Equipment                       | Vessel A (n = 1) | Vessel B (n = 1)      | Vessel C (n = 1)       | Vessel D (n = 1)               |
|----------------------------------------|------------------|-----------------------|------------------------|--------------------------------|
| Vessel and auxiliary boat              | 1.576.000 \$     | 924.214 \$            | 642.123 \$             | 448.000 \$                     |
| 3 main engines and 5 generators        | 1.000.000 \$     | 1.000.000 \$          | 1.000.000 \$           | 780.000 \$<br>(2 main engines) |
| Shaft, sleeve, propeller, rudder parts | 250.000 \$       | 250.000 \$            | 250.000 \$             | 250.000 \$                     |
| Front and middle propeller             | 100.000 \$       | 50.000\$ (just front) | 50.000 \$ (just front) | 50.000 \$ (just front)         |

| Vessel Equipment                                    | Vessel A (n = 1)                    | Vessel B (n = 1)                    | Vessel C (n = 1)                    | Vessel D (n = 1)                   |
|-----------------------------------------------------|-------------------------------------|-------------------------------------|-------------------------------------|------------------------------------|
| Bow anchor, main capstan and reducers               | 250.000 \$                          | 250.000 \$                          | 250.000 \$                          | 250.000 \$                         |
| Crane                                               | 150.000 \$<br>(3 cranes)            | 100.000 \$<br>(2 cranes)            | 100.000 \$<br>(2 cranes)            | 50.000 \$<br>(1 crane)             |
| Refrigerated sea water (RSW)                        | 350.000 \$                          | -                                   | -                                   | -                                  |
| Fish vacuuming system                               | 125.000 \$                          | 125.000 \$                          | 125.000 \$                          | 125.000 \$                         |
| Ice machine                                         | 50.000 \$<br>(2 pc 10 ton capacity) | 25.000 \$<br>(1 pc 10 ton capacity) | 25.000 \$<br>(1 pc 10 ton capacity) | 12.500 \$<br>(1 pc 5 ton capacity) |
| Panel and electrical installation, drivers          | 400.000 \$                          | 400.000 \$                          | 400.000 \$                          | 400.000 \$                         |
| Furniture, glass and kitchenware                    | 200.000 \$                          | 200.000 \$                          | 200.000 \$                          | 200.000 \$                         |
| Current meter, fish meter & radars                  | 750.000 \$                          | 750.000 \$                          | 750.000 \$                          | 250.000\$ (radar only)             |
| hydraulic machine & water pump                      | 150.000 \$                          | 150.000 \$                          | 150.000 \$                          | 150.000 \$                         |
| Sonar-Operational frequency band from 70 to 120 kHz | 250.000 \$                          | 250.000 \$                          | -                                   | -                                  |
| Sonar- (Operational frequency 85 kHz)               | 150.000 \$                          | 150.000 \$                          | 150.000 \$                          | -                                  |
| Sonar (Operating frequency vary from 54 to 60 kHz)  | 120.000 \$                          | 120.000 \$                          | 120.000 \$                          | 120.000 \$                         |
| Net reels (4 pieces)                                | 60.000 \$                           | 60.000 \$                           | 60.000 \$                           | 60.000 \$                          |
| Purse seine nets                                    | 500.000 \$                          | 500.000 \$                          | 500.000 \$                          | 500.000 \$                         |
| Engine of Auxiliary vessels (2 pieces)              | 100.000 \$                          | 100.000 \$                          | 100.000 \$                          | 100.000 \$                         |
| Toplam                                              | 6.881.000 US \$                     | 5.404.214 US \$                     | 4.872.123 US\$                      | 3.745.500 US \$                    |

**Table S4.** National regulations changes for the depth limit, overall drop and length of purse seine nets, and status of Istanbul Strait for purse seiners from 1986 to present.

| Implementation Year | Depth limitation for purse seine fishing                                                                                             | Status of Strait                    | Overall drop of the purse seine net | Overall length of the purse seine net |
|---------------------|--------------------------------------------------------------------------------------------------------------------------------------|-------------------------------------|-------------------------------------|---------------------------------------|
| 1986–1987           | 5 m for all territorial waters                                                                                                       | NA                                  | NA                                  | 730 m                                 |
| 1987–1988           | 5 m for all territorial waters                                                                                                       | Open                                | NA                                  |                                       |
| 1988–1989           | 8 m for all territorial waters                                                                                                       | Open                                | 145 m                               |                                       |
| 1989–1990           | 8 m for all territorial waters                                                                                                       | Open                                | 145 m                               |                                       |
| 1990–1991           | 8 m for all territorial waters                                                                                                       | Open                                | 145 m                               |                                       |
| 1991–1992           | 16 m for all territorial waters<br>16 m for mechanized                                                                               | Open                                | 145 m                               |                                       |
| 1992–1993           | 10 m for non-mechanized vessels<br>8 m in Marmara<br>18 m for mechanized vessels                                                     | Open                                | 145 m                               | 730 m                                 |
| 1993–1994           | 11 m for non-mechanized vessels<br>9 m in Marmara<br>18 m for mechanized vessels                                                     | Open                                | 145 m                               |                                       |
| 1994–1995           | 11 m for non-mechanized vessels<br>9 m in Marmara<br>18 m for mechanized vessels                                                     | Open                                | 110 m                               |                                       |
| 1995–1996           | 11 m for non-mechanized vessels<br>9 m in Marmara<br>18 m for mechanized vessels                                                     | Open                                | 110 m                               |                                       |
| 1996–1997           | 11 m for non-mechanized vessels<br>9 m in Marmara<br>18 m for mechanized vessels                                                     | Open                                | NA                                  |                                       |
| 1997–1998           | 11 m for non-mechanized vessels<br>18 m for mechanized vessels                                                                       | Open                                | NA                                  |                                       |
| 1998–1999           | NA                                                                                                                                   | Open                                | NA                                  | 730 m                                 |
| 1999–2000           | 18 m for 1 April–1 May 1999 and 1 January–1 May 2000<br>11 m for 1 September–31 December 1999<br>18 m for mechanized vessels         | Open                                | NA                                  |                                       |
| 2000–2002           | 11 m for non-mechanized vessels<br>11 m for mechanized just in Marmara between 1 September–1 December<br>18 m for mechanized vessels | Open in just 1 September–1 December | 164 m in the Sea of Marmara         |                                       |
| 2002–2004           | 11 m for non-mechanized vessels<br>11 m for mechanized just in Marmara between 1 September–1 December                                | Open                                | 164 m in the Sea of Marmara         |                                       |
| 2004–2006           | 18 m for other territorial waters<br>11 m just in Marmara between 1 September–1 December                                             | Open                                | 164 m in the Sea of Marmara         |                                       |
| 2006–2008           | 18 m for other territorial waters<br>11 m just in Marmara between 1 September–1 December                                             | Open                                | 164 m for all territorial waters    |                                       |
| 2008–2012           | 18 m for other territorial waters<br>11 m just in Marmara between 1 September–1 December                                             | Open                                | 164 m for all territorial waters    |                                       |

---

|           |                                                                                                                                      |      |                                  |
|-----------|--------------------------------------------------------------------------------------------------------------------------------------|------|----------------------------------|
| 2012–2016 | 24 m for all territorial waters                                                                                                      | Open | 164 m for all territorial waters |
| 2016–2020 | 18 m for 1 September–15 December in the Black Sea<br>24 m for 16 December–14 April in Black Sea<br>24 m for other territorial waters | Open | 164 m for all territorial waters |
| 2020–2024 | 18 m for 1 September–15 December in Black Sea<br>24 m for 16 December–14 April in Black Sea<br>24 m for other territorial waters     | Open | 164 m for all territorial waters |

---
